# Supplementary material for: A Cost-Effective Semi-Ab Initio Approach to Model Relaxation in Rare-Earth Single-Molecule Magnets
Source: PubMed Central journal article supplement (PMC8450932; doi:10.1021/acs.jpclett.1c02367), 2021-09-07
Supplement: jz1c02367_si_001.pdf [file jz1c02367_si_001.pdf]

## Supporting Information

# A Cost-Effective Semi Ab-initio Approach to Model Relaxation in Rare-Earth Single-Molecule Magnets

**Elena Garlatti,<sup>a,b</sup> Alessandro Chiesa,<sup>a,b</sup> Pietro Bonfà,<sup>a</sup> Emilio Macaluso,<sup>a,b</sup> Ifeanyi J. Onuorah,<sup>a</sup> Vijay S. Parmar,<sup>c</sup> You-Song Ding,<sup>d</sup> Yan-Zhen Zheng,<sup>d</sup> Marcus Giansiracusa,<sup>c</sup> Daniel Reta,<sup>c\*</sup> Eva Pavarini,<sup>e</sup> Tatiana Guidi,<sup>f</sup> David P. Mills,<sup>c</sup> Nicholas F. Chilton,<sup>c</sup> Richard E. P. Winpenny,<sup>c</sup> Paolo Santini,<sup>a,b</sup> Stefano Carretta,<sup>a,b</sup>**

<sup>a</sup> Università di Parma, Dipartimento di Scienze Matematiche, Fisiche e Informatiche, 43124 Parma, Italy;

<sup>b</sup> UdR Parma, INSTM, I-43124 Parma, Italy.

<sup>c</sup> Department of Chemistry, The University of Manchester, Oxford Road, Manchester, M13 9PL, UK.

<sup>d</sup> Frontier Institute of Science and Technology, Xi'an Jiaotong University, 99 Yanxiang Road, 710054 Xi'an, Shaanxi, China.

<sup>e</sup> Institut for Advanced Simulation Forschungszentrum Juelich and JARA High-Performance Computing, RWTH Aachen University, 52062 Aachen, Germany.

<sup>f</sup> ISIS Facility, Rutherford Appleton Laboratory, Didcot OX11 0QX, UK.

\*Present Address: Department of Inorganic and Organic Chemistry, University of Barcelona, Barcelona, Spain.

## Synthesis

### General experimental procedures

All syntheses and manipulations were conducted under argon with the rigorous exclusion of oxygen and water using Schlenk line and glovebox techniques. THF was obtained from a central solvent purification facility (SPS drying columns), dried further over 4 Å molecular sieves for at least 1 week, and degassed before use. For NMR spectroscopy C<sub>6</sub>D<sub>6</sub> was dried by refluxing over potassium, and was vacuum transferred and degassed by three freeze-pump-thaw cycles before use. [Ln(<sup>t</sup>BuO)Cl(THF)<sub>5</sub>][BPh<sub>4</sub>]<sub>2</sub>·2THF (Ln = Dy, **2**; Y, **2-Y**),<sup>1</sup> [Dy(Mes\*O)<sub>2</sub>(THF)<sub>2</sub>Br] (**3**)<sup>2</sup>, Mes\*OK<sup>3</sup> and anhydrous YBr<sub>3</sub><sup>4</sup> were prepared according to published procedures. <sup>1</sup>H (400 MHz) and <sup>13</sup>C{<sup>1</sup>H} (100 MHz and 125 MHz) NMR spectra were obtained on an Avance III 400 MHz or 500 MHz spectrometers at 298 K. These were referenced to the solvent used, or to external TMS (<sup>1</sup>H, <sup>13</sup>C). ATR-IR spectra were recorded as microcrystalline powders using a Bruker Tensor 27 ATR-Fourier Transform infrared (ATR-FTIR) spectrometer. Elemental analyses were performed by Mrs Anne Davies and Mr Martin Jennings at the Microanalysis Service in the Department of Chemistry at The University of Manchester, UK.

### [Y(Mes\*O)<sub>2</sub>(THF)<sub>2</sub>Br]·3THF (**3-Y·3THF**):

A mixture of YBr<sub>3</sub> (0.326 g; 1 mmol) and two equivalents of Mes\*OK (0.605 g; 2 mmol) in a Schlenk flask was cooled to -78 °C before adding 30 ml of THF. The reaction mixture was refluxed with continuous stirring for 1.5 hours, then stirred at room temperature for further 16 hours. After the stirring was stopped, the cloudy reaction mixture settled into a grey powder (KBr) and clear, colorless supernatant (product). The supernatant was filtered and concentrated to get colorless block-shaped crystals of **3-Y·3THF** (0.485 g, 0.46 mmol; 46%) when stored for 36 hours at 0 °C. The crystals were dried in vacuo to afford a white crystalline solid, which <sup>1</sup>H NMR spectroscopy indicates is desolvated **3-Y**. Anal. Calcd for C<sub>44</sub>H<sub>74</sub>BrO<sub>4</sub>Y: C, 63.22; H, 8.92 Found (%): C, 61.90; H, 9.02. Elemental analysis results show lower carbon values than predicted, which we attribute to carbide formation from incomplete combustion. <sup>1</sup>H NMR (400.07 MHz, C<sub>6</sub>D<sub>6</sub>, 298 K, ppm): δ = 0.95, (m, 8H, THF-OCH<sub>2</sub>CH<sub>2</sub>), 1.42 (s, 18H, *p*-C(CH<sub>3</sub>)<sub>3</sub>), 1.75 (s, 36H, *o*-C(CH<sub>3</sub>)<sub>3</sub>), 3.84 (m, 8H, THF-OCH<sub>2</sub>CH<sub>2</sub>), 7.59 (s, 4H, *m*-CH) (see [Figure S1](#)). <sup>13</sup>C{<sup>1</sup>H} NMR (400.07 MHz, C<sub>6</sub>D<sub>6</sub>, 298 K, ppm): δ = 25.41 (THF-OCH<sub>2</sub>CH<sub>2</sub>), 32.73 (*o*-C(CH<sub>3</sub>)<sub>3</sub>), 33.20 (*p*-C(CH<sub>3</sub>)<sub>3</sub>), 35.07 (*p*-C(CH<sub>3</sub>)<sub>3</sub>), 36.45 (*o*-C(CH<sub>3</sub>)<sub>3</sub>), 72.98 (THF-OCH<sub>2</sub>CH<sub>2</sub>), 122.66 (*m*-Ar), 138.24 (*o*-Ar), 138.84 (*p*-Ar), ipso-Ar not observed (see [Figure S2](#)). FTIR (ATR, microcrystalline):  $\tilde{\nu}$  = 2949 (m, br), 2904 (w), 2871 (m, br), 1475 (w), 1457 (w), 1416 (w), 1385 (w), 1356 (w), 1231 (s), 1200 (m), 1153 (w), 1120 (s), 1009 (s), 921 (w), 889 (m, br), 877 (m, br), 857 (m, br), 832 (m, br), 817 (m, br), 780 (s), 746 (s), 672 (w), 643 (w), 532 (m), 456 (m), 435 (m) cm<sup>-1</sup> (see [Figure S3](#)).

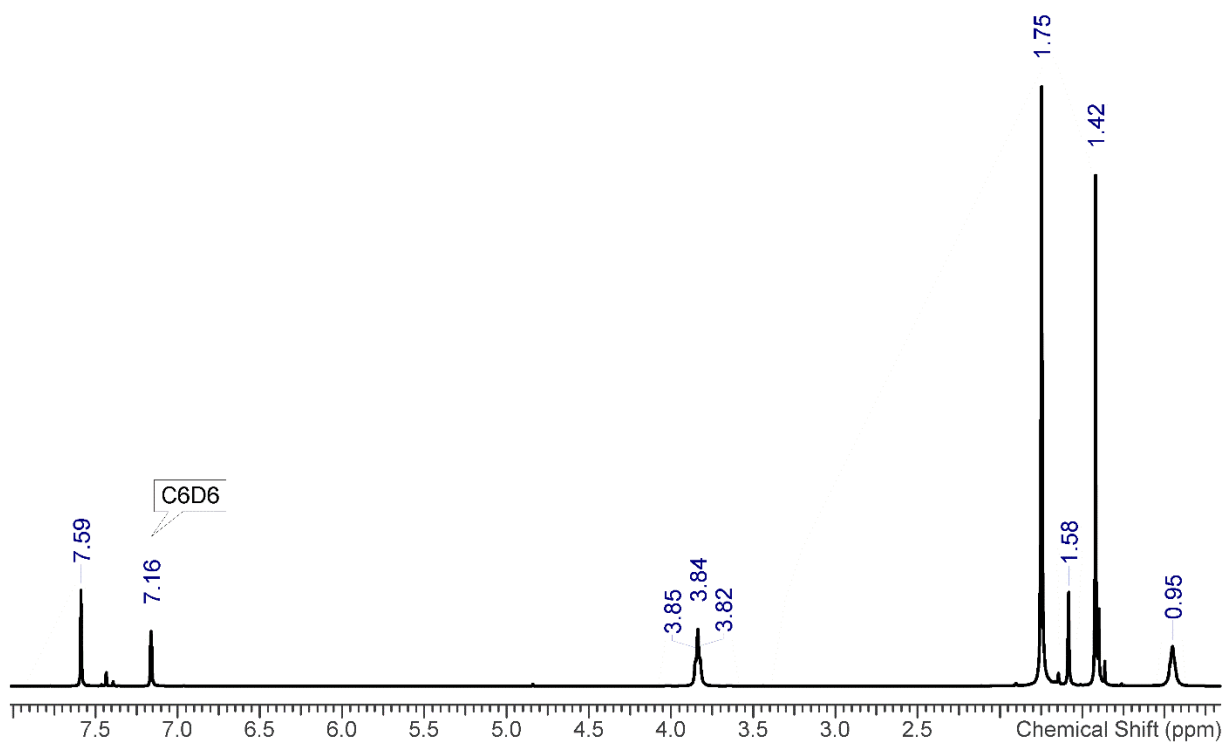

FIG. S1.  $^1\text{H}$  NMR spectrum of  $[\text{Y}(\text{Mes}^*\text{O})_2(\text{THF})_2\text{Br}]$  (**3-Y**) in  $\text{C}_6\text{D}_6$ .

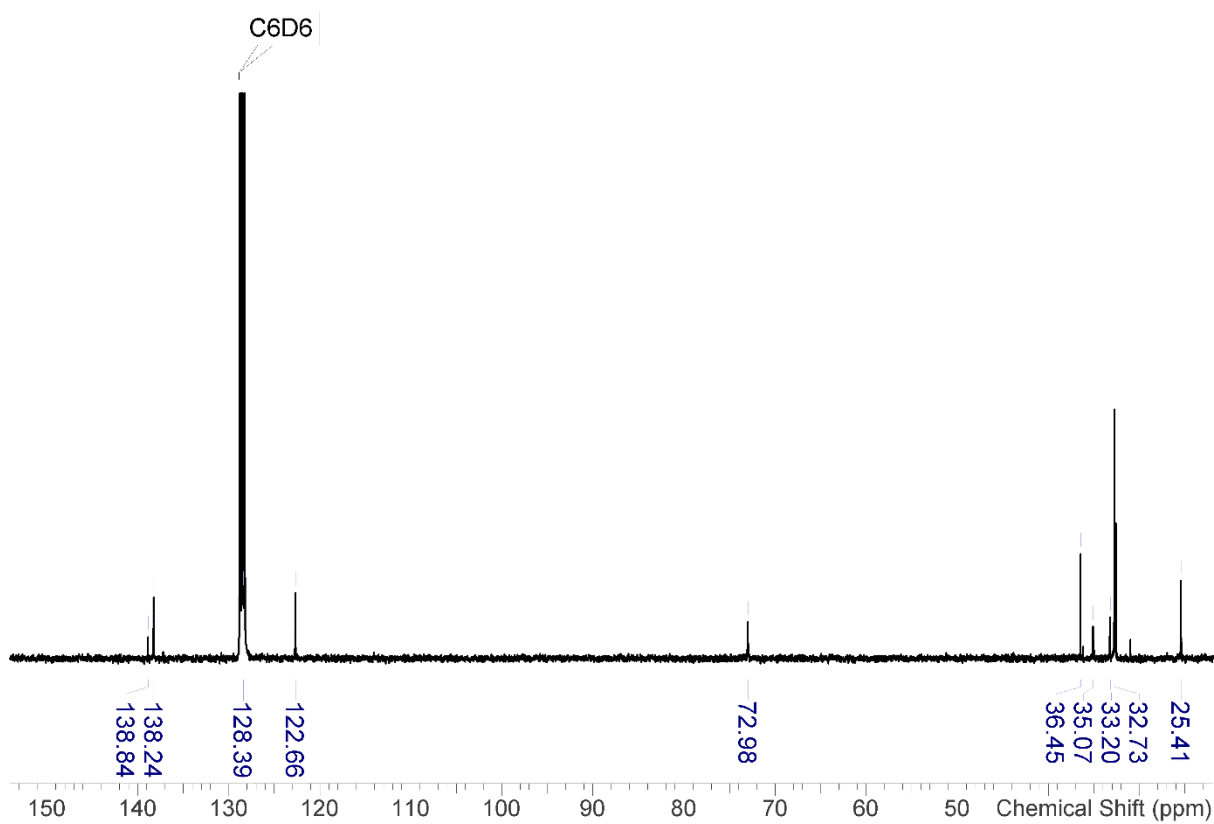

FIG. S2.  $^{13}\text{C}$  NMR spectrum of  $[\text{Y}(\text{Mes}^*\text{O})_2(\text{THF})_2\text{Br}]$  (**3-Y**) in  $\text{C}_6\text{D}_6$ .

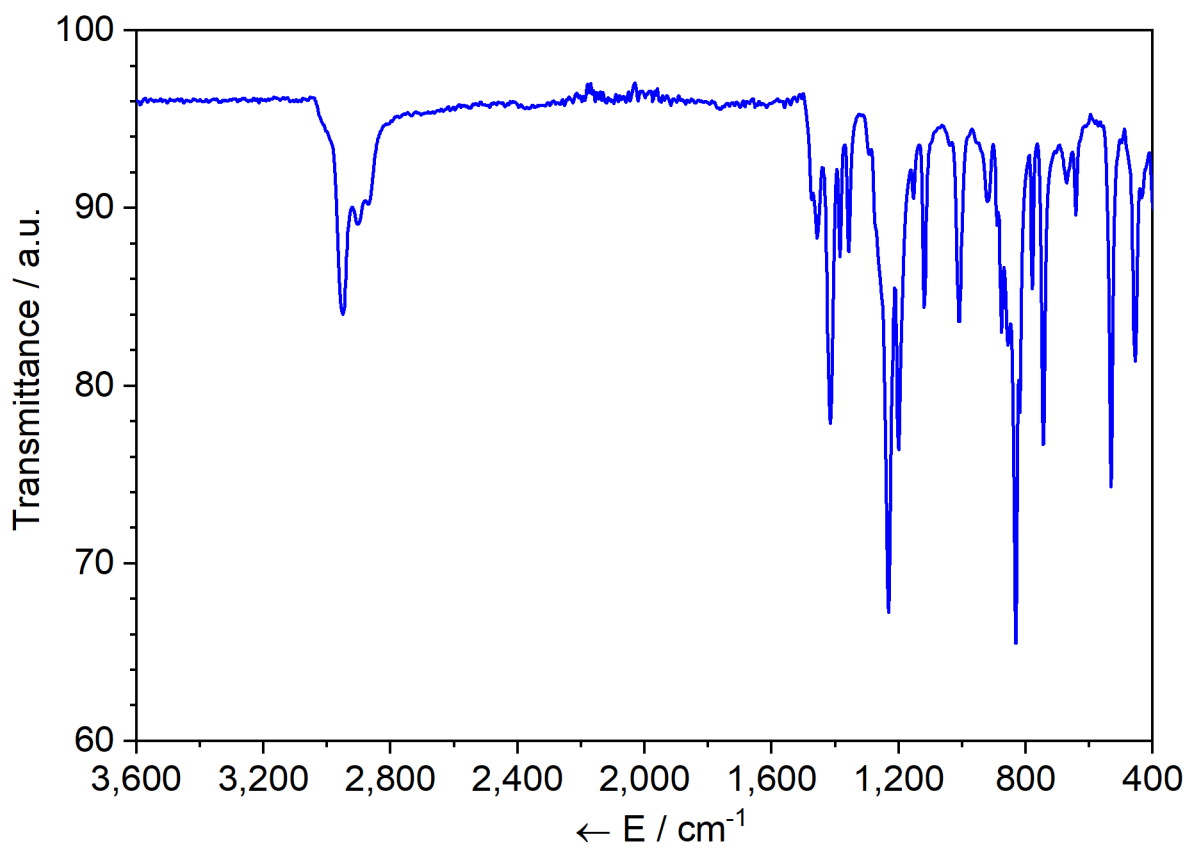

FIG. S3. ATR-IR spectrum of  $[Y(\text{Mes}^*\text{O})_2(\text{THF})_2\text{Br}] \cdot 3\text{THF}$  (**3-Y**), 400-3600  $\text{cm}^{-1}$ .

## Crystallography

Single crystal XRD was performed on crystalline batches of **2**,<sup>2</sup> **2-Y**<sup>2</sup> **3**<sup>2</sup> and **3-Y**. For all complexes apart from **3-Y** we were able to confirm the identity of these samples by the close agreement of unit cell parameters to those reported previously in the literature (See CCDC 1450752, 1566471 and 1978054).

The crystal data for  $[\text{Y}(\text{Mes}^*\text{O})_2(\text{THF})_2\text{Br}]\cdot 3\text{THF}$  is compiled in Table S1. The crystals were examined using an Oxford Diffraction Supernova diffractometer, equipped with CCD area detector and mirror-monochromated Mo K $\alpha$  radiation ( $\lambda = 0.71073 \text{ \AA}$ ). Intensities were integrated from data recorded on  $1^\circ$  frames by  $\omega$  rotation. Cell parameters were refined from the observed positions of all strong reflections in each data set. A multi-scan absorption correction with a beam profile was applied.<sup>5</sup> The structures were solved using direct methods by SHELXS; the datasets were refined by full-matrix least-squares on all unique  $F^2$  values.<sup>6</sup> CrysAlisPro<sup>5</sup> was used for control and integration, and SHELX<sup>6,7</sup> was employed through OLEX2<sup>8</sup> for structure solution and refinement. ORTEP-3<sup>9</sup> and POV-Ray<sup>10</sup> were employed for molecular graphics. CCDC #2088557 contains the supplementary crystal data for this article. These data can be obtained free of charge from the Cambridge Crystallographic Data Centre via [www.ccdc.cam.ac.uk/data\\_request/cif](http://www.ccdc.cam.ac.uk/data_request/cif).

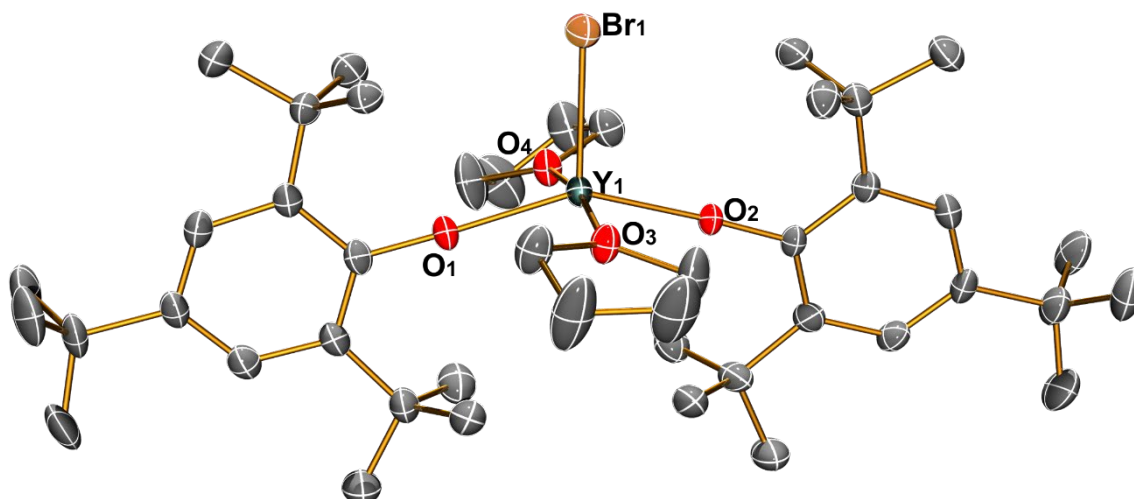

**FIG. S4:** View of the molecular structure of  $[\text{Y}(\text{Mes}^*\text{O})_2(\text{THF})_2\text{Br}]\cdot 3\text{THF}$  (**3-Y** $\cdot 3\text{THF}$ ) from single crystal XRD at 150 K with thermal ellipsoids drawn at 40% probability level (Dy turquoise, Br brown, O red, C grey). H atoms and lattice solvent are omitted for clarity.

**TAB. S1.** Crystallographic data for [Y(Mes\*O)<sub>2</sub>(THF)<sub>2</sub>Br]·3THF (**3-Y**·3THF).

|                                                              | [Y(Mes*O) <sub>2</sub> (THF) <sub>2</sub> Br]·3THF |
|--------------------------------------------------------------|----------------------------------------------------|
| Formula                                                      | C <sub>56</sub> H <sub>98</sub> BrO <sub>7</sub> Y |
| Fw, g mol <sup>-1</sup>                                      | 1052.16                                            |
| Cryst size, mm                                               | 0.262 x 0.178 x 0.152                              |
| Crystal system                                               | monoclinic                                         |
| Space group                                                  | P2 <sub>1</sub> /c                                 |
| Collection Temperature (K)                                   | 150(2)                                             |
| a, (Å)                                                       | 17.6623(9)                                         |
| b, (Å)                                                       | 15.9491(7)                                         |
| c, (Å)                                                       | 20.6765(11)                                        |
| α, (°)                                                       | 90                                                 |
| β, (°)                                                       | 102.179(5)                                         |
| γ, (°)                                                       | 90                                                 |
| V, (Å <sup>3</sup> )                                         | 5693.4(5)                                          |
| Z                                                            | 4                                                  |
| ρ <sub>calc</sub> g cm <sup>-3</sup>                         | 1.227                                              |
| μ, mm <sup>-1</sup>                                          | 1.773                                              |
| No. of reflections measured                                  | 22025                                              |
| No. of unique reflections, R <sub>int</sub>                  | 10424, 0.0485                                      |
| No. of reflections with F <sup>2</sup> > 2s(F <sup>2</sup> ) | 6776                                               |
| Transmission coefficient range                               | 0.538-1.000                                        |
| R <sub>1</sub> (I > 2σ(I))                                   | 0.0535, 0.1021                                     |
| wR <sub>2</sub> (all data)                                   | 0.1032, 0.1208                                     |
| S <sup>a</sup>                                               | 1.018                                              |
| Parameters, Restraints                                       | 696, 948                                           |

Max./min. difference map, e Å<sup>-3</sup>

0.628, -0.446

---

<sup>a</sup>Conventional  $R = \sum||F_o| - |F_c||/\sum|F_o|$ ;  $R_w = [\sum w(F_o^2 - F_c^2)^2/\sum w(F_o^2)^2]^{1/2}$ ;  $S = [\sum w(F_o^2 - F_c^2)^2/\text{no. data} - \text{no. params}]^{1/2}$  for all data.

**TAB. S2:** Selected bond lengths (Å) and angles (°) in [Y(Mes\*O)<sub>2</sub>(THF)<sub>2</sub>Br]·3THF (**3-Y-3THF**).

| <b>Lengths</b> | <b>3-Y</b> | <b>Angles</b> | <b>3-Y</b> |
|----------------|------------|---------------|------------|
| Y—O1           | 2.109(3)   | O1-Y-O2       | 146.4(1)   |
| Y—O2           | 2.110(2)   | O1-Y-O3       | 86.33(9)   |
| Y—O3           | 2.348(3)   | O1-Y-O4       | 87.94(9)   |
| Y—O4           | 2.325(2)   | O2-Y-O3       | 88.89(9)   |
| Y—Br           | 2.6876(6)  | O2-Y-O4       | 90.62(9)   |
|                |            | O3-Y-O4       | 168.85(9)  |
|                |            | Br-Y-O1       | 108.74(7)  |
|                |            | Br-Y-O2       | 104.62(7)  |
|                |            | Br-Y-O3       | 92.23(7)   |
|                |            | Br-Y-O4       | 98.67(7)   |

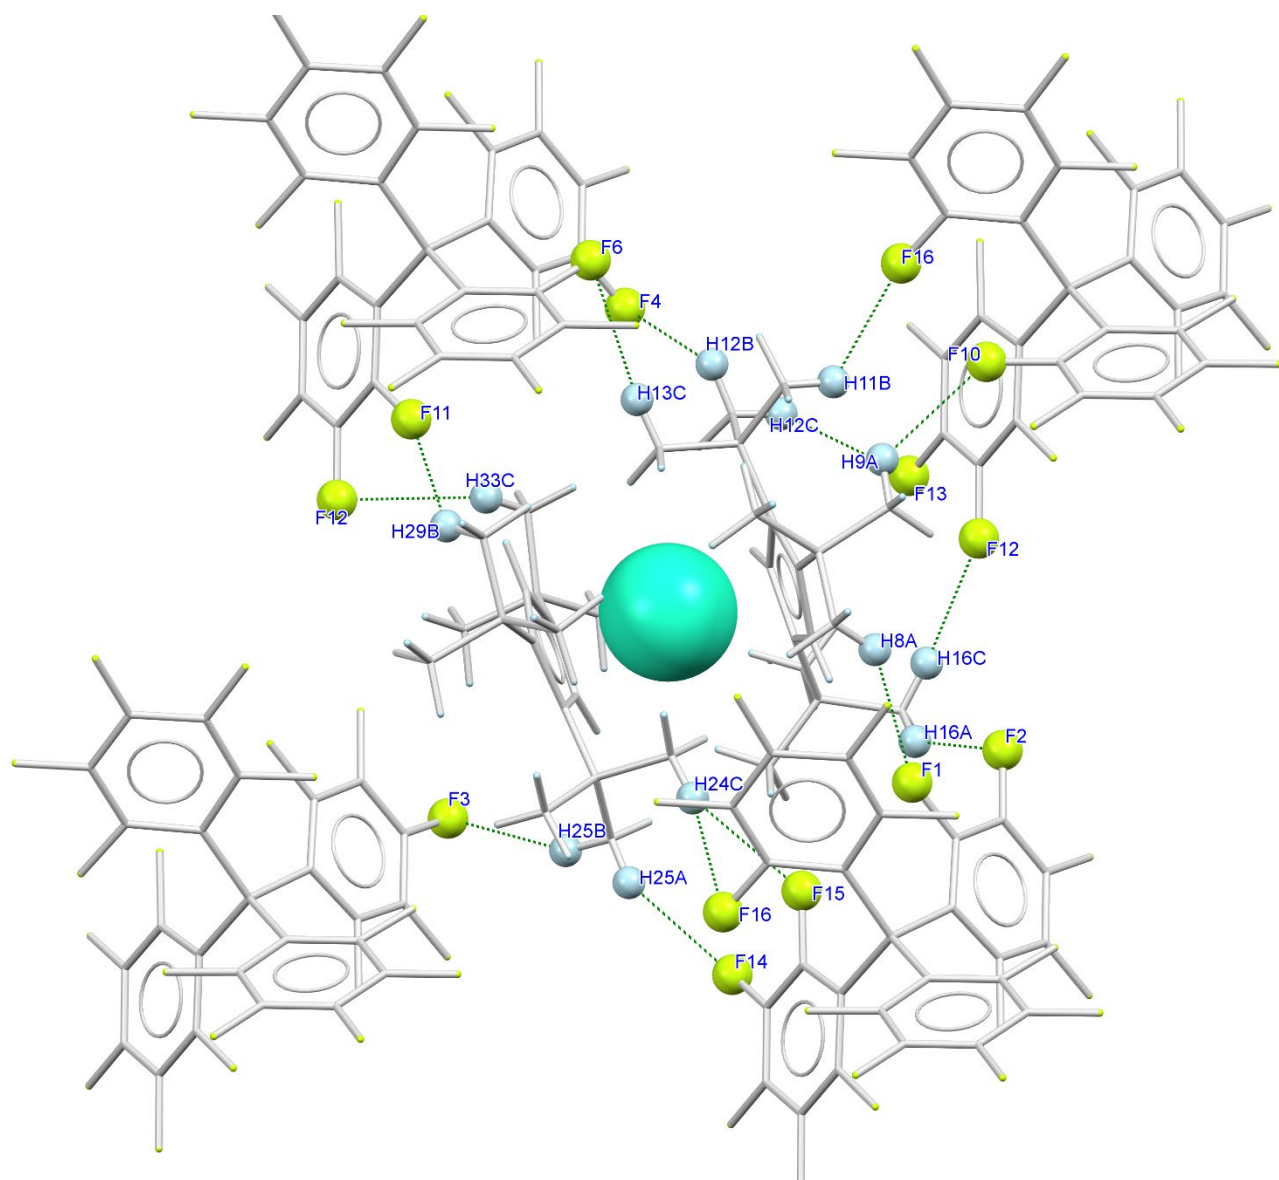

**FIG. S5:** View of the packing of the  $[B(C_6F_5)_4]$  anion and the dysprosium cation held by the hydrogen bonding network in  $[Dy(C_5H_2^tBu_{3-1,2,4})_2][B(C_6F_5)_4]$ . Colors (Dy teal, F lime, C light grey, H light blue); only the atoms showing short contacts and the metals are shown in Ball and Stick mode for clarity.



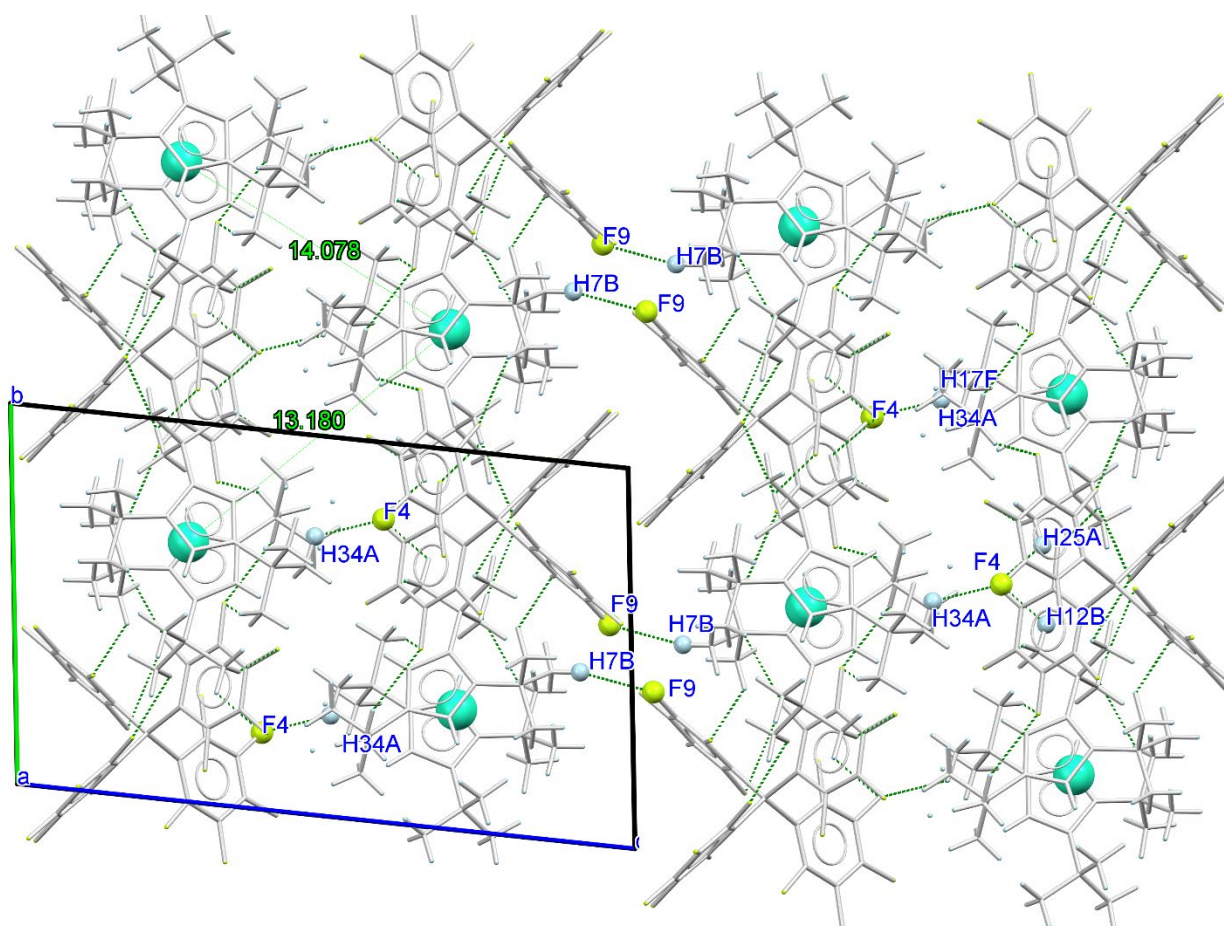

**FIG. S6:** View of the hydrogen bonding network between two layers in the crystal packing along the x-axis in  $[\text{Dy}(\text{C}_5\text{H}_2^t\text{Bu}_3-1,2,4)_2][\text{B}(\text{C}_6\text{F}_5)_4]$  (1). Colors (Dy teal, F lime, C light grey, H light blue); only the atoms showing short contacts and the metals are shown in Ball and Stick mode for clarity.

**TAB. S3.** The F...H short contact distances (Å) and angles (°) in [Dy(C<sub>5</sub>H<sub>2</sub><sup>t</sup>Bu<sub>3</sub>-1,2,4)<sub>2</sub>][B(C<sub>6</sub>F<sub>5</sub>)<sub>4</sub>] (**1**).

| Atom1 | Atom2 | Distance | C-F...H angle | F...H-C angle |
|-------|-------|----------|---------------|---------------|
| F1    | H8A   | 2.532    | 156.1         | 137.0         |
| F2    | H16A  | 2.240    | 108.8         | 140.2         |
| F3    | H25B  | 2.638    | 90.2          | 154.3         |
| F4    | H12B  | 2.656    | 110.2         | 124.9         |
| F4    | H34A  | 2.450    | 150.2         | 122.1         |
| F9    | H7BD  | 2.574    | 119.1         | 166.1         |
| F10   | H9A   | 2.730    | 137.6         | 108.5         |
| F11   | H29B  | 2.707    | 160.2         | 139.9         |
| F12   | H32K  | 2.757    | 136.8         | 140.7         |
| F12   | H33C  | 2.726    | 84.8          | 72.0          |
| F12   | H16C  | 2.704    | 141.5         | 158.1         |
| F13   | H12C  | 2.717    | 87.5          | 154.4         |
| F13   | H32U  | 2.746    | 126.4         | 163.6         |
| F14   | H25A  | 2.703    | 108.1         | 123.6         |
| F15   | H24C  | 2.727    | 125.4         | 129.4         |

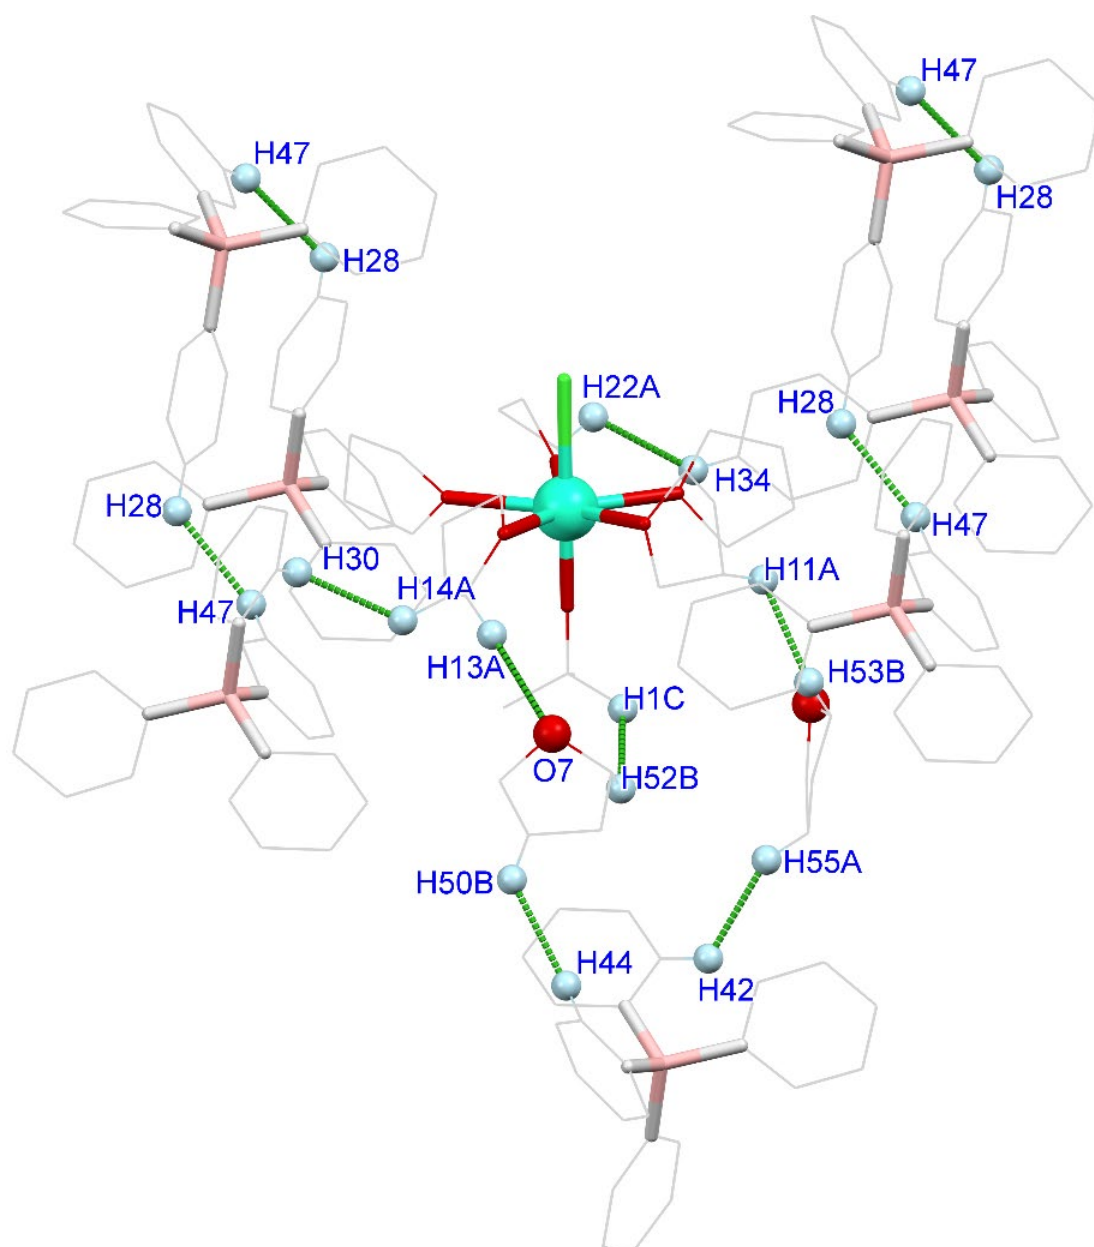

**FIG. S7.** View of the packing of the  $[B(C_6H_5)_4]$  anion and the  $[Dy(tBuO)Cl(THF)_5]$  cation held by the hydrogen bonding network in  $[Dy(tBuO)Cl(THF)_5][BPh_4] \cdot 2THF$  (**2**). Colors (Dy teal, B pink, O red, Cl green, C light grey, H light blue); only the atoms showing short contacts are shown in Ball and Stick mode for clarity.

**TAB. S4.** The  $H \cdots O$  and  $H \cdots H$  short contact distances (Å) in  $[Dy(tBuO)Cl(THF)_5][B(C_6H_5)_4]$  (**2**).

| Atom1 | Atom2 | Length |
|-------|-------|--------|
| H13A  | O7    | 2.692  |
| H14A  | H30   | 2.381  |
| H22A  | H34   | 2.371  |
| H1C   | H52B  | 2.389  |
| H11A  | H53B  | 2.244  |
| H47   | H28   | 2.379  |
| H50B  | H44   | 2.391  |
| H55A  | H42   | 2.325  |

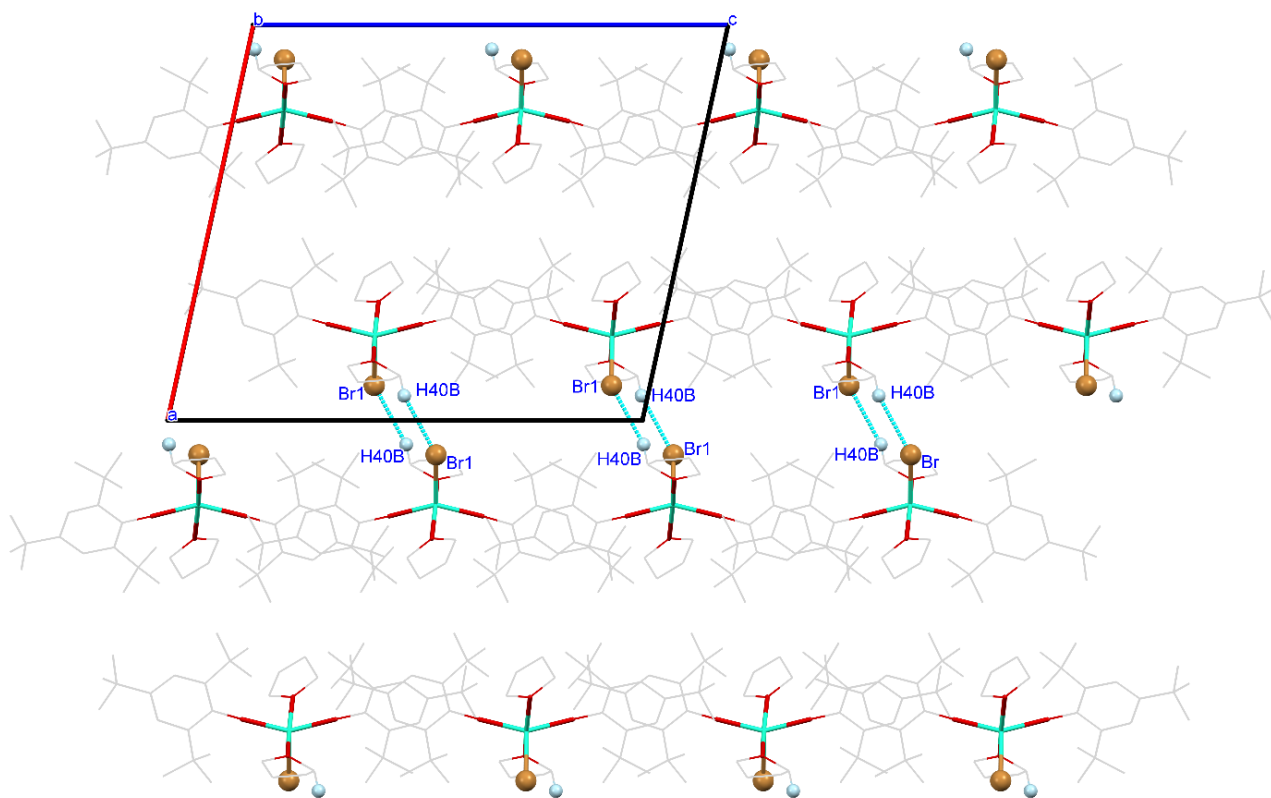

**FIG. S8.** View of the hydrogen bonding network between two layers in the crystal packing along the x-axis in  $[\text{Dy}(\text{Mes}^*\text{O})_2(\text{THF})_2\text{Br}]$  (**3**). The Dy-Br<sub>1</sub>⋯H<sub>40B</sub> distance is 2.938 Å. Colors (Dy teal, O red, Br brown, C light grey, H light blue); only the atoms showing short contacts are shown in Ball and Stick mode for clarity.

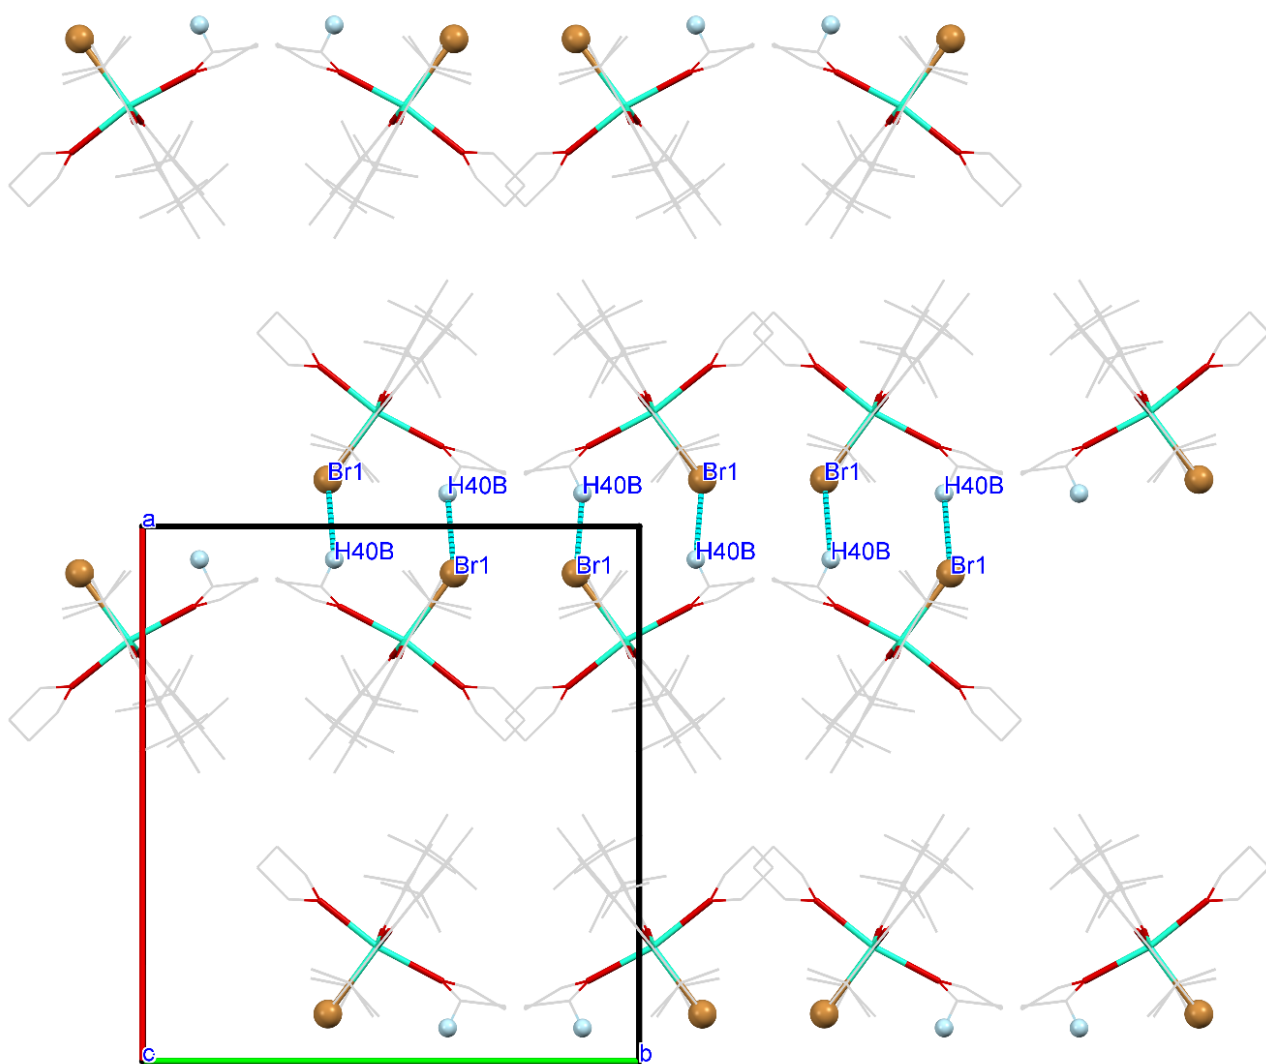

**FIG. S9.** View of the hydrogen bonding network between two layers in the crystal packing along the y-axis in [Dy(Mes\*O)<sub>2</sub>(THF)<sub>2</sub>Br] (**3**). The Dy-Br<sub>1</sub>...H<sub>40B</sub> distance is 2.938 Å. Colors (Dy teal, O red, Br brown, C light grey, H light blue); only the atoms showing short contacts are shown in Ball and Stick mode for clarity.

## Ab initio calculations

### Density Functional Theory (DFT) calculations

The simulations were performed with the GPU enabled version of the DFT-based code QuantumESPRESSO.<sup>11</sup> Norm conserving pseudopotentials were used for all atomic species<sup>12</sup> and the functional proposed by Perdew, Burke, and Ernzerhof (PBE)<sup>13</sup> was adopted for evaluating the exchange-correlation contribution. Reciprocal space was sampled with a 2x2x2 K Monkhorst-Pack grid and the cut-off energy for the expansion of the Kohn-Sham wavefunction into plane waves was set to 120 Ry. For each structure atomic positions were optimized until the residual force acting on all atomic coordinates was smaller than 1e-6 Ry/Bohr. Phonon density of states were computed using the finite displacement method as implemented in the PHONOPY package<sup>14,15</sup>. Atomic displacements of 0.01 Ang. were employed to obtain the force constants using 2x2x1 supercells (SC). In this latter case the plane wave cut-off was reduced to 100 Ry and reciprocal space was sampled using the gamma point only.

The phonon frequencies are reported in Fig. S10. A very small residual imaginary component is only present near the gamma point. The convergence with respect to the SC expansion was checked against the results obtained for the smaller 1x1x1 SC. We found that low energy harmonic phonon frequencies vary with the supercell size only with differences generally smaller than 0.5 meV (the only exception being a transverse mode of **2** that is correctly described only when adopting the bigger SC). We therefore concluded that the results obtained with the 2x2x1 supercells are well converged on the energy scale required for the description of the dispersive modes.

Inter-molecular hydrogen bond interactions were included in the DFT calculations. These interactions affect the shape of the phonon DOS at low energy, which, in turn has influences Raman relaxation.

The phonon density of states (pDOS) projected on the various atomic species was used to produce the neutron weighted DOS that is later compared with the experiment. Brillouin zone integration was performed using a Gaussian smearing with a variable FWHM for different energy regions (see Fig.2 in the main text). An extended pDOS for compounds **2** and **3** is reported in Fig.S11.

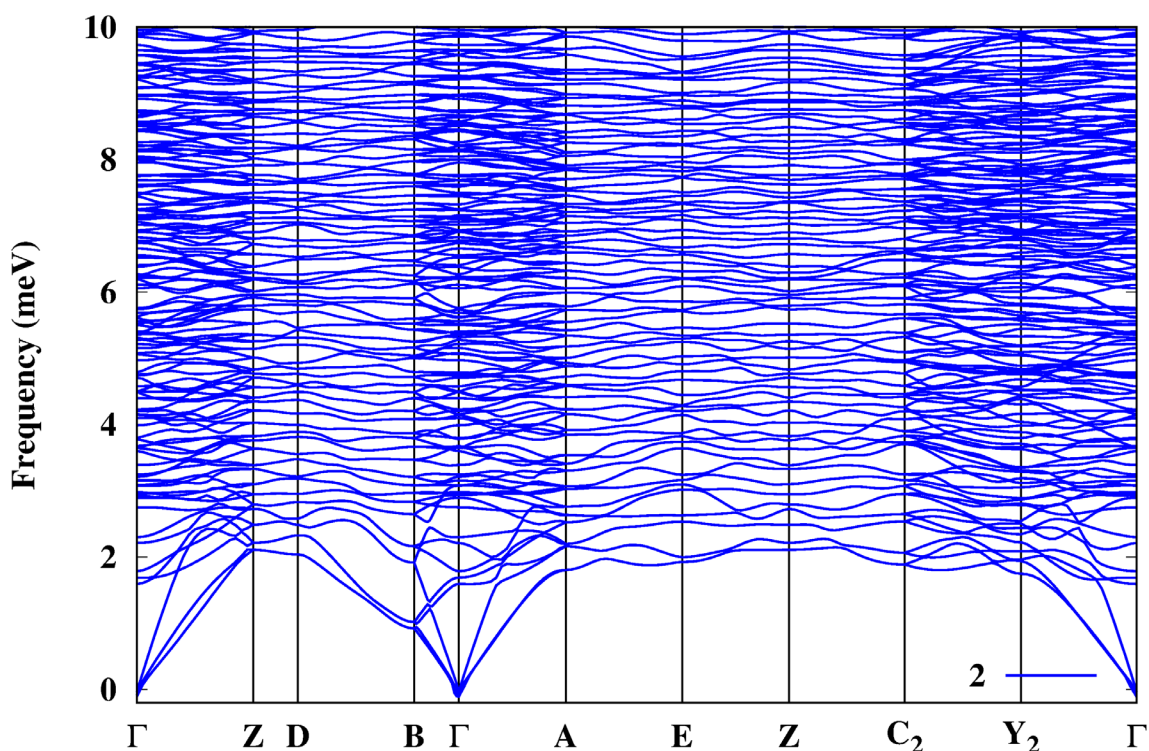



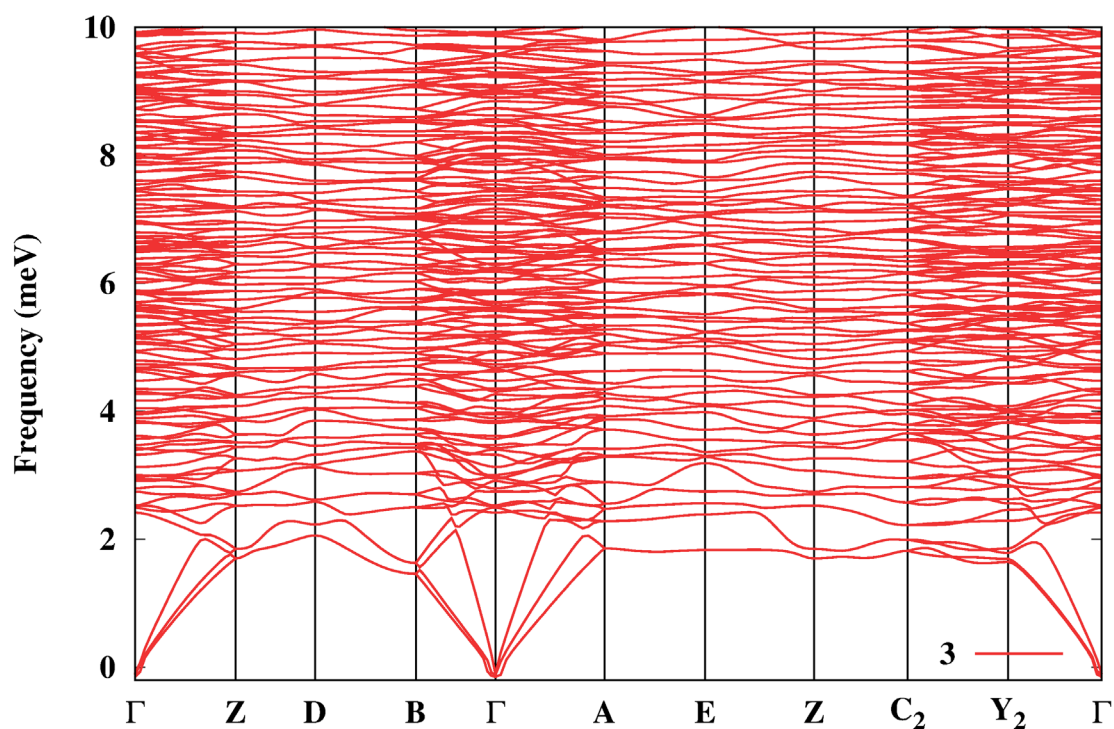

FIG. S10. DFT (PBE) low-energy phonon dispersions of compounds **2** and **3** (blue and red lines respectively).

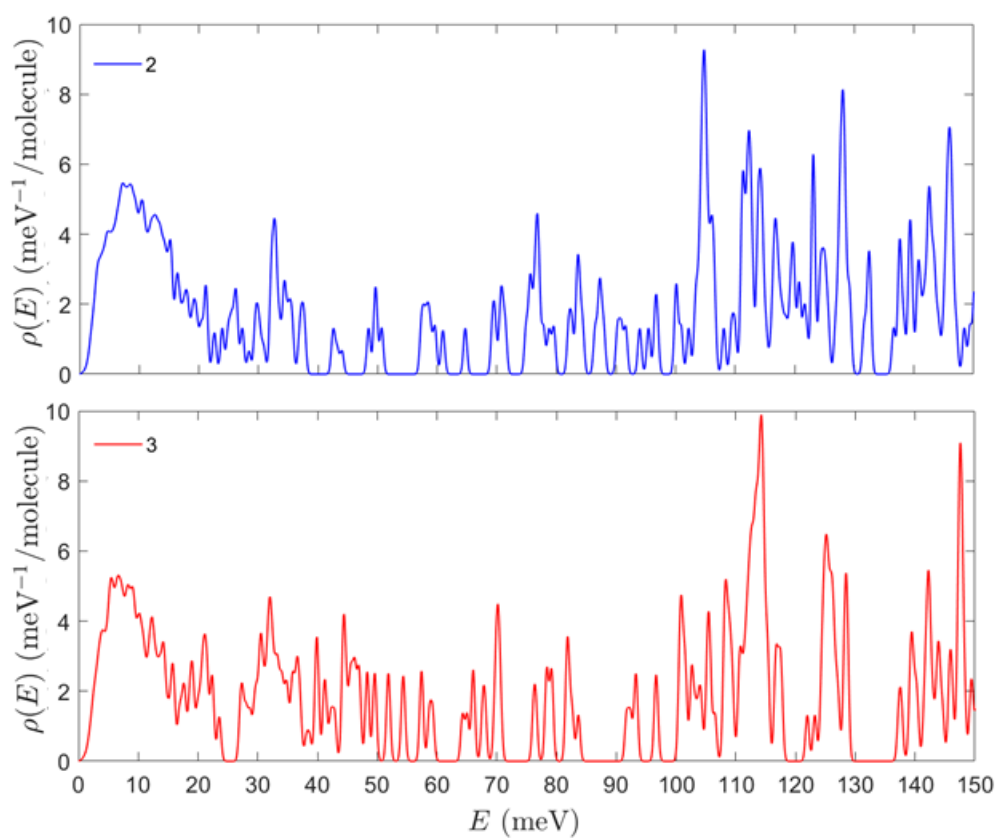

FIG. S11a. DFT (PBE) pDOS  $\rho(E)$  of compounds **2** and **3** (blue and red line respectively) up to 150 meV, obtained with a single FWHM = 0.29 meV. For the sake of comparison, each  $\rho(E)$  has been normalized for the number of molecule in the unit cell.

### Gas-phase calculations

Gas-phase molecular geometry optimizations on molecules **2** and **3**, using the the XRD single crystal structures as an initial guess, were performed with Gaussian09d<sup>16</sup> suite of programs using the PBE<sup>13</sup> functional (same as for periodic calculations) with cc-pVTZ<sup>17</sup> basis set for all coordinating atoms, cc-pVDZ<sup>17</sup> for the rest of non-metal atoms, the Stuttgart RSC 1997<sup>18</sup> effective core potential (ECP) for the 28 core electrons of yttrium and the corresponding valence basis set for the remaining valence electrons, and Grimme's dispersion corrections.<sup>19</sup> To facilitate convergence, dysprosium is substituted by yttrium (where the isotopic mass is set to 162.5, that of the naturally abundant dysprosium), which is justified by their similar ionic radii and the fact that these derivatives are widely found to be structural analogues. Calculation of normal modes was performed by explicit calculation of the Hessian at the optimized geometry, making sure that the forces and displacements are zero and that all frequencies are positive. Normal modes energies of compounds **2** and **3** can be found in Table S5.

**TAB. S5.** Gas-phase DFT mode energies.

| <b>2</b>        | <b>3</b>        |
|-----------------|-----------------|
| Frequency (meV) | Frequency (meV) |
| 2.5778          | 1.4779          |
| 4.3213          | 2.2067          |
| 4.5901          | 3.3208          |
| 4.7696          | 3.7036          |
| 4.9871          | 3.7582          |
| 5.1756          | 3.9818          |
| 5.6695          | 4.4587          |
| 6.0333          | 4.8848          |
| 7.0825          | 5.3234          |
| 7.6410          | 6.0185          |
| 7.8842          | 6.2163          |
| 8.4048          | 6.8420          |
| 8.7229          | 7.2144          |
| 9.2519          | 7.5142          |
| 9.5589          | 8.7889          |
| 11.0001         | 9.2170          |
| 12.0302         | 9.5513          |
| 12.2059         | 10.4728         |
| 12.7451         | 10.5827         |
| 12.9557         | 11.4256         |
| 13.1385         | 12.0583         |
| 13.5856         | 12.6456         |
| 14.3497         | 12.7292         |
| 14.5833         | 13.9033         |
| 14.9752         | 14.0927         |
| 15.8652         | 14.7930         |
| 16.1981         | 15.2137         |
| 16.9718         | 15.4787         |
| 17.3490         | 16.1355         |
| 18.0340         | 16.5855         |
| 18.2837         | 17.0739         |
| 18.5709         | 18.2515         |



|          |         |
|----------|---------|
| 19.9368  | 18.5749 |
| 20.3522  | 18.9103 |
| 20.4337  | 18.9658 |
| 22.7679  | 19.5456 |
| 23.2960  | 20.5473 |
| 25.4654  | 20.8972 |
| 26.4475  | 21.4028 |
| 27.9854  | 22.7513 |
| 28.4044  | 23.2537 |
| 31.8318  | 24.1563 |
| 33.0047  | 27.8530 |
| 33.2324  | 28.2383 |
| 33.4793  | 28.4062 |
| 33.8344  | 28.7943 |
| 34.2873  | 28.8239 |
| 34.4567  | 30.1058 |
| 36.1901  | 30.5872 |
| 42.4148  | 30.8612 |
| 43.0690  | 31.2059 |
| 57.9973  | 31.5754 |
| 58.2356  | 31.8932 |
| 60.4552  | 32.5687 |
| 69.0146  | 33.0094 |
| 69.0548  | 33.2573 |
| 69.1176  | 33.3149 |
| 69.1825  | 33.5940 |
| 69.4657  | 34.0759 |
| 82.0323  | 35.6204 |
| 82.0643  | 35.7291 |
| 82.1949  | 36.1138 |
| 82.3297  | 36.3723 |
| 82.5328  | 36.5053 |
| 95.1295  | 36.9648 |
| 101.6736 | 37.1163 |
| 102.2115 | 38.9824 |
| 102.3156 | 39.5640 |
| 102.6099 | 40.1568 |
| 102.9215 | 40.2953 |
| 104.3358 | 41.6501 |
| 104.4569 | 41.7099 |
| 104.5115 | 42.5559 |
| 104.6943 | 43.1236 |
| 104.8792 | 44.0245 |
| 105.6096 | 44.6377 |
| 105.6860 | 44.8192 |
| 106.5040 | 44.9332 |
| 106.5389 | 45.0826 |
| 108.2812 | 45.2910 |
| 108.6505 | 46.5455 |

|          |          |
|----------|----------|
| 108.8381 | 46.5910  |
| 110.5562 | 46.6238  |
| 110.7978 | 46.6934  |
| 110.9129 | 48.6466  |
| 110.9911 | 48.7689  |
| 111.1484 | 50.0873  |
| 112.2602 | 50.2384  |
| 114.3101 | 52.1142  |
| 114.3491 | 52.2103  |
| 114.4022 | 54.7976  |
| 114.4302 | 54.9791  |
| 114.5546 | 57.0742  |
| 116.5979 | 57.1620  |
| 116.6756 | 58.3585  |
| 116.7109 | 58.4305  |
| 116.9575 | 64.7508  |
| 117.0636 | 65.1335  |
| 121.5273 | 65.8291  |
| 123.0593 | 65.9306  |
| 123.1244 | 68.0007  |
| 124.6165 | 68.0950  |
| 124.6458 | 69.5129  |
| 124.7402 | 72.0625  |
| 124.8629 | 75.7144  |
| 125.0993 | 75.8411  |
| 126.8785 | 77.6557  |
| 126.9237 | 77.8895  |
| 127.0348 | 78.5645  |
| 127.1889 | 78.6137  |
| 127.4936 | 82.6912  |
| 137.8906 | 84.5453  |
| 137.9249 | 92.2727  |
| 138.2338 | 92.6993  |
| 138.3731 | 93.6267  |
| 138.4669 | 93.6905  |
| 140.7607 | 95.8832  |
| 140.9099 | 95.9282  |
| 141.0059 | 96.7241  |
| 141.0589 | 101.2702 |
| 141.1922 | 101.3456 |
| 142.5568 | 101.8815 |
| 142.7083 | 102.9872 |
| 142.7472 | 103.7543 |
| 142.7683 | 105.3613 |
| 142.8183 | 105.5119 |
| 144.1783 | 106.0328 |
| 148.9996 | 107.1838 |
| 149.1480 | 107.2738 |
| 149.1870 | 107.8404 |

|          |          |
|----------|----------|
| 149.2669 | 108.3157 |
| 149.4433 | 108.4828 |
| 149.5354 | 109.1591 |
| 149.6020 | 109.3030 |
| 150.6211 | 111.4563 |
| 150.8357 | 111.6953 |
| 150.9797 | 111.7779 |
| 151.1360 | 112.0138 |
| 151.2190 | 112.2067 |
| 155.8852 | 112.2570 |
| 155.9495 | 112.2917 |
| 155.9942 | 112.4915 |
| 156.0284 | 112.7562 |
| 156.1331 | 112.8298 |
| 160.5607 | 112.8809 |
| 160.5811 | 112.9463 |
| 160.6109 | 113.0084 |
| 160.6226 | 113.0183 |
| 160.8297 | 113.1165 |
| 162.1520 | 113.3286 |
| 162.3655 | 113.3479 |
| 162.5790 | 113.4734 |
| 162.5820 | 113.5010 |
| 162.9191 | 113.8042 |
| 163.5623 | 113.8240 |
| 163.6761 | 113.8933 |
| 164.8481 | 114.4746 |
| 164.9588 | 114.9678 |
| 165.0556 | 116.3361 |
| 165.1167 | 117.1024 |
| 165.1265 | 123.4348 |
| 166.6794 | 123.5224 |
| 171.9091 | 123.5275 |
| 172.8107 | 123.5758 |
| 173.5107 | 123.7133 |
| 174.2129 | 123.8028 |
| 174.2628 | 123.8300 |
| 174.2874 | 123.8570 |
| 174.3227 | 123.9765 |
| 174.3625 | 124.2807 |
| 175.2280 | 124.3000 |
| 175.3233 | 124.3232 |
| 175.4450 | 124.3387 |
| 175.5355 | 124.4355 |
| 175.5858 | 127.3306 |
| 175.6138 | 128.5051 |
| 175.7251 | 135.9862 |
| 177.1837 | 136.3106 |
| 177.5033 | 136.5780 |

|          |          |
|----------|----------|
| 177.6058 | 138.1962 |
| 178.1030 | 140.8707 |
| 178.7148 | 140.9391 |
| 179.1094 | 141.5717 |
| 179.7651 | 143.5729 |
| 180.1906 | 143.8135 |
| 180.3278 | 144.9657 |
| 180.4402 | 145.0287 |
| 180.5643 | 146.3281 |
| 367.0851 | 146.8202 |
| 367.1556 | 146.8439 |
| 367.4237 | 147.0344 |
| 367.5782 | 147.1049 |
| 367.8820 | 147.1496 |
| 367.9466 | 147.2047 |
| 368.1906 | 147.2822 |
| 368.3239 | 147.3812 |
| 368.5595 | 147.5435 |
| 368.7582 | 147.6191 |
| 368.8099 | 148.2786 |
| 370.0085 | 148.5125 |
| 370.3687 | 148.6379 |
| 370.3924 | 149.7620 |
| 370.4077 | 151.4084 |
| 370.5076 | 151.4953 |
| 370.8678 | 151.5385 |
| 371.0965 | 152.5696 |
| 371.0982 | 152.9844 |
| 371.1245 | 153.2993 |
| 371.1893 | 153.3577 |
| 371.2784 | 154.8292 |
| 371.3712 | 156.1153 |
| 377.6034 | 156.2753 |
| 377.6392 | 158.2423 |
| 377.8878 | 158.4918 |
| 377.9584 | 158.5945 |
| 378.1612 | 160.6707 |
| 378.1776 | 162.4856 |
| 378.3819 | 162.5281 |
| 378.4409 | 162.6784 |
| 378.6501 | 162.8991 |
| 378.9598 | 163.0139 |
| 379.0617 | 163.4414 |
| 379.1391 | 163.4795 |
| 379.2450 | 163.5295 |
| 379.3621 | 163.9215 |
| 379.4552 | 164.0814 |
| 379.4896 | 164.1104 |
| 379.5293 | 164.1708 |

|          |          |
|----------|----------|
| 379.6392 | 164.1821 |
| 379.7083 | 164.1963 |
| 379.9263 | 164.5877 |
| 380.0355 | 164.6359 |
| 380.2558 | 165.2122 |
| 380.3225 | 165.8625 |
| 380.4157 | 167.3651 |
| 380.4589 | 167.4125 |
| 380.8286 | 167.6805 |
|          | 167.6955 |
|          | 168.2999 |
|          | 168.3193 |
|          | 171.6074 |
|          | 171.6580 |
|          | 171.8168 |
|          | 172.2967 |
|          | 172.8595 |
|          | 173.1216 |
|          | 173.1280 |
|          | 173.1458 |
|          | 173.2375 |
|          | 173.7806 |
|          | 173.8174 |
|          | 173.8851 |
|          | 173.9016 |
|          | 173.9044 |
|          | 173.9336 |
|          | 174.0551 |
|          | 174.1419 |
|          | 174.1832 |
|          | 174.2225 |
|          | 174.5292 |
|          | 174.6954 |
|          | 174.9728 |
|          | 175.1123 |
|          | 175.2171 |
|          | 175.3236 |
|          | 175.5528 |
|          | 175.6109 |
|          | 176.1028 |
|          | 176.2785 |
|          | 176.4961 |
|          | 176.6580 |
|          | 176.7312 |
|          | 176.8020 |
|          | 176.8781 |
|          | 176.9136 |
|          | 177.0508 |
|          | 177.2486 |

177.6421  
177.8355  
178.0047  
178.9281  
179.0433  
179.0909  
179.1507  
179.5299  
179.6019  
180.2000  
180.4504  
193.3457  
193.3705  
198.8150  
198.8786  
366.6719  
366.6752  
366.8664  
366.8708  
367.0131  
367.0726  
367.1920  
367.2452  
367.5607  
367.5694  
367.6220  
367.6329  
367.6665  
367.8250  
367.9987  
368.1022  
368.3018  
368.3540  
368.4112  
368.6652  
370.1463  
370.2068  
370.9833  
371.4378  
372.1899  
372.8677  
376.3945  
376.5670  
376.7161  
376.7183  
376.8453  
376.8700  
376.8740  
376.8984

376.9347  
377.0372  
377.1082  
377.2962  
377.4341  
377.5319  
377.5588  
377.5938  
377.7283  
377.7451  
377.7522  
377.8114  
377.8422  
377.9968  
378.2021  
378.3430  
378.3662  
378.3804  
378.4050  
378.4305  
378.6552  
378.6806  
379.1553  
379.9198  
380.0712  
381.1898  
381.2639  
381.4605  
382.2481  
382.9102  
383.4747  
384.6191  
384.6318  
384.8210  
385.2894  
385.9775  
389.3163  
389.5615  
392.9445  
393.1471

### ***CASSCF-SO calculations***

CASSCF-SO calculations on complexes **2** and **3** were performed with the program MOLCAS 8.0<sup>20</sup> employing both the XRD-crystal and DFT-optimised structures, with no counterion or solvent molecules. The ANO-RCC basis set library<sup>21</sup> has been used for all the atoms ([ANO-RCC-VTZP] for Dy, [ANO-RCC-VDZP] for coordinating

atoms, and [ANO-RCC-VDZ] for C and H) with scalar relativistic effects accounted using the second-order Douglas–Kroll–Hess transformation. The molecular orbitals (MOs) were optimized in state-averaged CAS(9,7)SCF calculations (9 electrons in the 7 *4f*-orbitals) considering 21, 224 and 490 roots for the sextet, quartet and doublet spin states, respectively. These sets of spin-free states were then used to construct and diagonalize the spin-orbit coupling Hamiltonian in the basis of all sextet, 128 quartet and 130 doublets with the RASSI module. The crystal field decomposition of the ground  $J = 15/2$  multiplet of the  ${}^6\text{H}$  term was performed with the SINGLE\_ANISO<sup>22</sup> module.

**TAB. S6.** Electronic structure of **2** and **3** calculated with CASSCF-SO using the crystal geometries. Each row corresponds to a Kramers doublet.

| Energy (meV) | Energy (K) | g1   | g2   | g3    | Angle | Wavefunction                                                                                                   | $\langle Jz \rangle$ |
|--------------|------------|------|------|-------|-------|----------------------------------------------------------------------------------------------------------------|----------------------|
| <b>2</b>     |            |      |      |       |       |                                                                                                                |                      |
| 0.00         | 0.00       | 0.00 | 0.00 | 19.88 | --    | 89% $ \pm 15/2\rangle + 11\% \mp 15/2\rangle$                                                                  | -5.9                 |
| 51.66        | 599.53     | 0.01 | 0.01 | 16.99 | 0.56  | 98% $ \pm 13/2\rangle$                                                                                         | 6.3                  |
| 77.60        | 900.54     | 3.41 | 4.45 | 13.30 | 88.50 | 57% $ \mp 1/2\rangle + 15\% \pm 1/2\rangle + 14\% \mp 11/2\rangle$                                             | -0.7                 |
| 82.18        | 953.66     | 1.30 | 4.53 | 9.33  | 15.73 | 55% $ \pm 11/2\rangle + 13\% \pm 3/2\rangle + 11\% \mp 11/2\rangle + 11\% \mp 3/2\rangle + 6\% \pm 1/2\rangle$ | -2.5                 |
| 83.72        | 971.55     | 1.58 | 5.06 | 9.23  | 82.86 | 49% $ \pm 3/2\rangle + 14\% \mp 3/2\rangle + 11\% \mp 1/2\rangle + 9\% \mp 11/2\rangle + 6\% \pm 1/2\rangle$   | 0.1                  |
| 89.14        | 1034.37    | 0.68 | 2.83 | 6.93  | 14.46 | 63% $ \pm 5/2\rangle + 20\% \mp 5/2\rangle + 6\% \pm 9/2\rangle$                                               | 1.3                  |
| 94.01        | 1090.88    | 0.62 | 2.72 | 12.36 | 38.08 | 60% $ \pm 9/2\rangle + 7\% \pm 5/2\rangle + 26\% \pm 7/2\rangle$                                               | 3.6                  |
| 95.02        | 1102.62    | 0.18 | 3.43 | 13.36 | 45.09 | 41% $ \pm 7/2\rangle + 24\% \mp 7/2\rangle + 5\% \mp 9/2\rangle + 25\% \pm 9/2\rangle$                         | -1.6                 |
| <b>3</b>     |            |      |      |       |       |                                                                                                                |                      |
| 0.00         | 0.00       | 0.00 | 0.00 | 19.87 | --    | 98% $ \pm 15/2\rangle$                                                                                         | -7.5                 |
| 54.21        | 629.08     | 0.01 | 0.01 | 16.99 | 1.54  | 95% $ \pm 13/2\rangle$                                                                                         | 6.5                  |
| 89.53        | 1038.99    | 1.09 | 2.59 | 13.01 | 16.25 | 80% $ \pm 11/2\rangle + 7\% \pm 7/2\rangle + 7\% \pm 3/2\rangle$                                               | 4.9                  |



|        |         |      |      |       |       |                                                                                                                                             |      |
|--------|---------|------|------|-------|-------|---------------------------------------------------------------------------------------------------------------------------------------------|------|
| 99.10  | 1149.95 | 1.86 | 4.65 | 12.15 | 82.20 | 17%  $\mp 1/2$ ) + 13%  $\pm 1/2$ )<br>+ 13%  $\pm 9/2$ ) + 10%  $\pm 3/2$ )<br>+ 10%  $\pm 5/2$ ) +<br>11%  $\mp 5/2$ ) + 11%  $\mp 9/2$ ) | 0.7  |
| 112.42 | 1304.58 | 3.13 | 5.05 | 9.52  | 88.64 | 42%  $\pm 9/2$ ) + 14%  $\mp 7/2$ )<br>+ 14%  $\mp 3/2$ ) + 8%  $\mp 9/2$ )<br>+ 5%  $\pm 3/2$ )                                            | 1.1  |
| 128.08 | 1486.30 | 0.45 | 0.74 | 13.74 | 89.15 | 36%  $\pm 7/2$ ) + 20%  $\mp 9/2$ )<br>+ 15%  $\mp 5/2$ ) + 9%  $\mp 1/2$ )<br>+ 8%  $\mp 7/2$ )                                            | -0.1 |
| 145.58 | 1689.38 | 0.21 | 0.30 | 16.72 | 89.97 | 33%  $\pm 5/2$ ) + 22%  $\mp 1/2$ )<br>+ 22%  $\mp 7/2$ ) + 6%  $\mp 5/2$ )                                                                 | -0.1 |
| 155.10 | 1799.85 | 0.02 | 0.07 | 19.41 | 88.17 | 44%  $\mp 1/2$ ) + 30%  $\pm 3/2$ )<br>+ 14%  $\mp 5/2$ )                                                                                   | 0.0  |

**TAB. S7.** Electronic structure of **2** and **3** calculated with CASSCF-SO using the PBE optimised geometries. Each row corresponds to a Kramers doublet.

| Energy (meV) | Energy (K) | g1   | g2   | g3    | Angle | Wavefunction                                              | $\langle J_z \rangle$ |
|--------------|------------|------|------|-------|-------|-----------------------------------------------------------|-----------------------|
| <b>2</b>     |            |      |      |       |       |                                                           |                       |
| 0.00         | 0.00       | 0.00 | 0.00 | 19.89 | --    | 95%  $\pm 15/2$ ) + 5%  $\mp 15/2$ )                      | 6.8                   |
| 51.97        | 603.08     | 0.00 | 0.00 | 17.02 | 0.34  | 94%  $\pm 13/2$ ) + 5%  $\mp 13/2$ )                      | 5.8                   |
| 83.68        | 971.08     | 1.27 | 1.59 | 13.18 | 1.65  | 89%  $\pm 11/2$ ) + 9%  $\pm 1/2$ )                       | 4.8                   |
| 89.87        | 1042.87    | 1.96 | 4.20 | 12.73 | 89.21 | 69%  $\pm 1/2$ ) + 14%  $\mp 1/2$ ) +<br>8%  $\pm 7/2$ )  | 0.5                   |
| 93.23        | 1081.89    | 3.61 | 3.81 | 5.14  | 81.67 | 58%  $\pm 3/2$ ) + 34%  $\mp 3/2$ )                       | -0.3                  |
| 98.07        | 1138.10    | 0.02 | 1.59 | 7.35  | 5.81  | 67%  $\pm 5/2$ ) + 12%  $\mp 5/2$ ) +<br>15%  $\pm 9/2$ ) | -1.9                  |
| 99.72        | 1157.24    | 0.51 | 0.96 | 11.08 | 20.71 | 75%  $\pm 9/2$ ) + 17%  $\pm 5/2$ )                       | 3.8                   |
| 102.26       | 1186.68    | 0.49 | 1.23 | 10.56 | 30.50 | 52%  $\pm 7/2$ ) + 42%  $\mp 7/2$ )                       | -0.4                  |
| <b>3</b>     |            |      |      |       |       |                                                           |                       |
| 0.00         | 0.00       | 0.00 | 0.00 | 19.85 | --    | 85%  $\pm 15/2$ ) + 13%  $\mp 15/2$ )                     | 5.4                   |
| 48.81        | 566.47     | 0.02 | 0.02 | 17.01 | 2.76  | 90%  $\pm 13/2$ ) + 8%  $\mp 13/2$ )                      | -5.5                  |
| 82.56        | 958.08     | 0.26 | 0.49 | 14.16 | 14.92 | 93%  $\pm 11/2$ )                                         | 5.3                   |

|        |         |      |      |       |       |                                                                                                                                                       |      |
|--------|---------|------|------|-------|-------|-------------------------------------------------------------------------------------------------------------------------------------------------------|------|
| 95.08  | 1103.34 | 2.47 | 3.06 | 14.77 | 77.82 | $20\% \pm 1/2\rangle + 18\% \pm 9/2\rangle + 12\% \pm 5/2\rangle + 9\% \mp 1/2\rangle + 9\% \mp 3/2\rangle + 7\% \mp 9/2\rangle + 7\% \pm 3/2\rangle$ | 0.8  |
| 105.30 | 1221.98 | 3.26 | 6.22 | 8.07  | 89.21 | $50\% \pm 9/2\rangle + 18\% \mp 3/2\rangle + 14\% \mp 7/2\rangle + 7\% \mp 9/2\rangle + 6\% \pm 1/2\rangle$                                           | 1.2  |
| 116.99 | 1357.57 | 1.51 | 2.71 | 12.95 | 89.65 | $50\% \pm 7/2\rangle + 29\% \mp 5/2\rangle + 13\% \mp 9/2\rangle + 6\% \mp 1/2\rangle$                                                                | 0.5  |
| 130.14 | 1510.25 | 0.40 | 0.65 | 16.88 | 89.36 | $22\% \mp 5/2\rangle + 17\% \pm 3/2\rangle + 16\% \pm 5/2\rangle + 15\% \pm 7/2\rangle + 15\% \mp 1/2\rangle$                                         | 0.1  |
| 136.83 | 1587.82 | 0.14 | 0.31 | 19.26 | 88.00 | $36\% \mp 1/2\rangle + 21\% \pm 3/2\rangle + 14\% \pm 1/2\rangle + 11\% \mp 5/2\rangle + 11\% \mp 3/2\rangle$                                         | -0.1 |

## Dispersive modes in molecular crystals

In a monoatomic 3-dimensional lattice the phonon spectrum has only acoustic modes with three possible polarizations (one “longitudinal” and two “transverse” modes).

Crystals of single-ion magnets (SIMs) like compounds **1**, **2** and **3** are instead periodic structures where the unit cell contains one or more complex molecules and thus a large number of different atoms.

We can imagine to obtain this structure starting from a reference Debye model, or also from a reference 3d monoatomic crystal as “similar” as possible to the actual crystal: the same type of Bravais Lattice as the SIM-crystal, atomic mass equal to the average mass of the SIM unit cell, spacing such that the average density is the same as in the SIM-crystal, and with the 3 phonon branches fitting the acoustic ones of the SIM-crystal. We can then imagine to smoothly perturb this monoatomic crystal and eventually revert it into the actual one by moving atoms, varying masses and harmonic couplings.

As soon as this process starts, the breaking of periodicity turns a group of unit cells of the monoatomic crystal into the unit cell of the SIM-crystal, and the associated modification of the Brillouin zone (BZ) boundaries in reciprocal space leads to folding of the old acoustic branches into the reduced BZ. The new resulting “optical” modes (i.e., modes whose energy does not tend to zero for  $q \rightarrow 0$ ), at zeroth-order are just a relabelling of the former three acoustic modes. But as the reversion proceeds, gaps in the phonon spectrum at the folding points open up and the displacement patterns are modified into those of the SIM-crystal. However, this modification will be minimal for the acoustic branches, and relatively small for low-energy “optical” modes, which are the evolution of old acoustic modes of relatively small  $q$ . These low-energy modes represent collective vibrations of the SIM with small bond stretching, and are thus expected to be the less modified by the “perturbation”. For this reason they can be called “pseudoacoustic” modes. Moving to high energies, the folding involves acoustic phonons of large  $q$ , and these will be strongly perturbed to eventually nearly match those of the isolated molecule

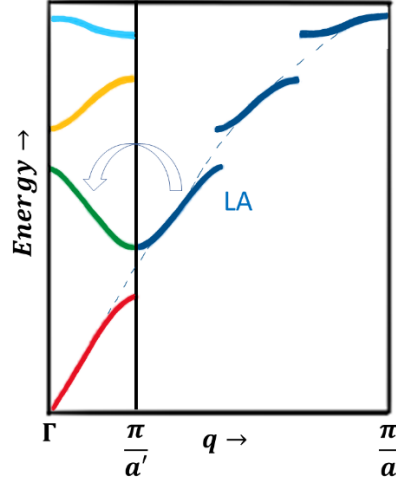

**FIG. S12.** Example of the folding of a longitudinal acoustic phonon (LA) of a 3d monoatomic lattice with into the reduced Brillouin zone.

## Spin-phonon couplings in the Orbach regime

In the Orbach regime the phonon-induced transitions between the 16 crystal field (CF) states of the  $J = 15/2$  multiplet are modelled within a master-equation approach by calculating the rate matrix  $\mathbf{W}$ , which contains transition probabilities between eigenstates of the magnetic terms of the Hamiltonian in eqn 1 induced by the terms  $H_{Jp}$ . The rate matrix is calculated as:

$$W_{t \rightarrow s} = \frac{2\pi}{\hbar} \zeta^2 \rho(\Delta E_{st}) n(\Delta E_{st}) |\langle s | V_1^\Gamma | t \rangle|^2,$$

where  $\Delta E_{st} = E_s - E_t$ , the energy difference between the two eigenstates  $|s\rangle$  and  $|t\rangle$  of the Hamiltonian  $H_J$ ,  $\rho(\Delta E_{st})$  is the phonon DOS at the frequency corresponding to the gap  $\rho(\Delta E_{st})$ ,  $n(x) = (e^{\frac{x}{k_B T}} - 1)^{-1}$  is the Bose-Einstein factor. The potential  $V_1^\Gamma = \sum_{k,q} \eta_\Gamma^{kq} O_k^q$  describes the modulation of the CF induced by the phonon modes, where the coefficients  $\eta_\Gamma^{kq}$  are obtained from ab initio calculations by considering the derivatives of the Steven's operators equivalents coefficients  $B_k^q$ , induced by atomic displacements of the ligands along the normal mode  $\Gamma$  computed in the gas-phase approximation. In this work, for each gap  $\Delta E_{st}$ , we consider all the phonon modes within an energy window of  $\Delta = \pm 1$  meV and we evaluate the average coupling. The values of  $\Delta$  falls in between the FWHM of the experimental data measured on MERLIN with  $E_i = 25-27$  meV and  $E_f = 54$  meV. This approach guarantees to take into account eventual discrepancies between the calculated energy gaps  $\Delta E_{st}$  and the resonant phonon modes, both calculated ab initio techniques but with different approaches.

## Inelastic Neutron Scattering

The INS experiment on compounds **2** and **3** was performed on the MERLIN spectrometer at the ISIS Neutron and Muon Source<sup>23</sup>. MERLIN is a high-flux time-of-flight direct spectrometer operating over a wide range of incident energies.

We measured 2g of polycrystalline sample of both compounds and their non-magnetic Yttrium analogues. We used aluminum sample-holder cans with a thin annular gap to minimize the absorption. Measurements were performed at  $T = 5$  K with three different incident energies in repetition rate multiplication (RRM) mode:

$E_i = 90, 130$  and  $180$  meV (maximum incident energy available when using the Gd Fermi chopper). The RRM mode allowed us to measure simultaneously up to 4 separate incident energies each and to collect spectra with optimized experimental resolution for each energy range.

The separation between magnetic and non-magnetic signals was performed by subtracting from the Dy sample data the Y variant ones (see Fig.S13), allowing us to detect for compound **2** a magnetic transition at 62 meV between the ground and the first excited doublets. The magnetic origin of this transition is confirmed by the Q dependence of its intensity (see Fig.S13), which differs from the typical  $Q^2$  behaviour of phononic excitations. This is the only magnetic transition expected for compound **2** in the explored energy range. We expected to observe a similar magnetic excitation for compound **3**, as predicted by CASSCF-SO calculations, but was not detectable being covered by phonon modes at around 60 meV.

The full neutron-weighted density of states (nw-DOS) over the whole explored energy range was reconstructed by merging the results of several INS datasets with different experimental configurations and incident energies. Thus, we normalized each dataset by the incident neutron flux at the corresponding energy measured by the beam monitor before the sample. We treated the data with the Mantid software,<sup>24</sup> which allowed us to extract the nw-DOS from the measured INS data on powders in the one-phonon incoherent approximation to be compared with DFT calculations.

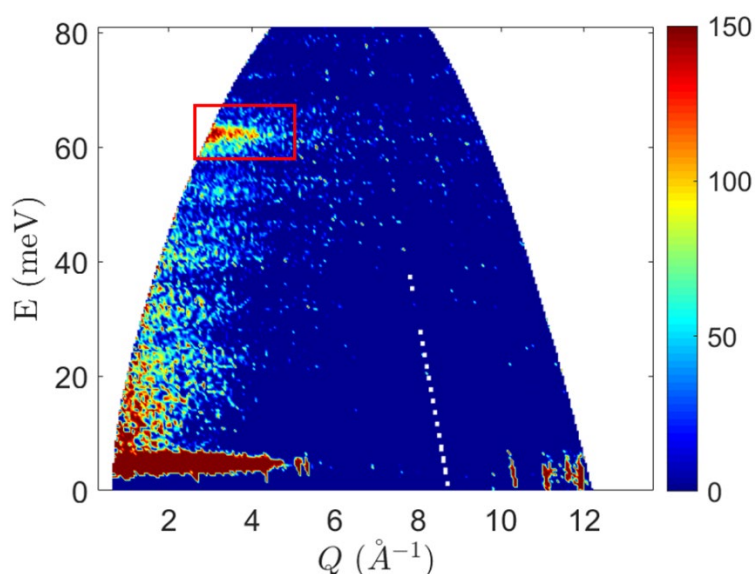

**FIG. S13.** Powder INS spectrum of **2** in the  $(Q, E)$  space, after subtraction of the signal of its diamagnetic Y analogue, measured on the MERLIN spectrometer with incident energy 90 meV. The monotonic decrease of the intensity of the peak at about 62 meV as a function of  $Q$  (highlighted by the red box) demonstrates its magnetic origin.

### **Incoherent approximation**

The inelastic scattering function  $S(Q, E)$  measured on powder samples is generally interpreted within the so-called incoherent approximation. Within this approach the  $S(Q, E)$  is proportional to the neutron-weighted DOS:

$$S_{inc}(Q, E) \propto \frac{Q^2}{E} \left[ \sum_i \frac{\sigma_i^{scatt}}{2m_i} \rho_i(E) \right],$$

where  $\rho_i(E)$  is the partial DOS for each element  $i$ , weighted by its scattering cross-section  $\sigma_i^{scatt}$  and its atomic mass  $m_i$ .  $Q$  and  $E$  are the momentum and energy transfer of the neutron. To reproduce the measured INS data, we performed periodic DFT simulations to calculate the partial DOS for each element and reconstruct the neutron-weighted DOS.

## Axiality of the crystal-field eigenstates

The *axiality* of the crystal-field eigenstate  $|\psi_i\rangle$  is defined as  $|\langle m_j | \psi_i \rangle|^2$  and measures the component of the eigenstate on the  $m_j$  state with the largest component. The *rhombicity* therefore defined as  $1 - |\langle m_j | \psi_i \rangle|^2$ . When averaged, these quantities are averaged over all the  $|m_j|$  doublets of the  $J = 15/2$  multiplet. Table S8 reports these values for the  $J = 15/2$  doublets of compounds 1, 2 and 3.

**TAB. S8.** Rhombicity of all the doublets of the  $J = 15/2$  multiplet for compounds 1, 2 and 3. The last two lines report the average rhombicity and axiality.

| Doublet                 | 2      | 3      | 1        |
|-------------------------|--------|--------|----------|
| Ground state            | 0.0004 | 0.0128 | 0.0064   |
| 1 <sup>st</sup> excited | 0.0029 | 0.0172 | 0.0046   |
| 2 <sup>nd</sup> excited | 0.3165 | 0.1036 | 0.0072   |
| 3 <sup>rd</sup> excited | 0.3799 | 0.75   | 0.0097   |
| 4 <sup>th</sup> excited | 0.0813 | 0.4263 | 0.0163   |
| 5 <sup>th</sup> excited | 0.0947 | 0.586  | 0.0287   |
| 6 <sup>th</sup> excited | 0.1226 | 0.7506 | 0.0965   |
| 7 <sup>th</sup> excited | 0.0746 | 0.6519 | 0.1049   |
| Average rhombicity      | 0.1341 | 0.4123 | 0.034288 |
| Average axiality        | 0.8658 | 0.5877 | 0.965713 |

## Comparison of effective coefficients with literature

**TAB. S9.** Comparison between effective parameters of Raman and Orbach processes extracted from our calculations (in the temperature range specified in the main text) and fitted from experiments (Refs. 2,25, in brackets).

|                  | 2                               | 3                           | 1                        |
|------------------|---------------------------------|-----------------------------|--------------------------|
| $n$              | $3.6 \pm 0.2$                   | $3.0 \pm 0.1$               | 2.3                      |
|                  | (4.6)                           | (2.86)                      | (2.2)                    |
| $C$              | $(5 \pm 3) \times 10^{-5}$      | $(3 \pm 1) \times 10^{-3}$  | $4 \times 10^{-7}$       |
|                  | $(2 \times 10^{-6})$            | $(4.5 \times 10^{-3})$      | $(1.6 \times 10^{-6})$   |
| $U_{\text{eff}}$ | 1093                            | 1127                        | 1786                     |
|                  | (950)                           | (1210)                      | (1760)                   |
| $\tau_0$         | $(1.5 \pm 0.5) \times 10^{-13}$ | $(3 \pm 2) \times 10^{-12}$ | $1.8 \times 10^{-11}$    |
|                  | $(3 \times 10^{-12})$           | $(7.9 \times 10^{-13})$     | $(1.99 \times 10^{-11})$ |

## References

- (1) Ding, Y.; Han, T.; Zhai, Y.; Reta, D.; Chilton, N. F.; Winpenny, R. E. P.; Zheng, Y., *Chem. Eur. J.* **2020**, *26* (26), 5893–5902.
- (2) Y.-S. Ding et al., *Nat. Commun.* **9**, 3134 (2018); Parmar, V. S.; Ortu, F.; Ma, X.; Chilton, N. F.; Clérac, R.; Mills, D. P.; Winpenny, R. E. P., *Chem. Eur. J.* **2020**, *26* (35), 7774–7778.
- (3) Michiue, K.; Jordan, R. F., *J. Mol. Catal. A Chem.* **2008**, *282* (1–2), 107–116.
- (4) Huang, W.; Le Roy, J. J.; Khan, S. I.; Ungur, L.; Murugesu, M.; Diaconescu, P. L., *Inorg. Chem.* **2015**, *54* (5), 2374–2382.
- (5) Agilent. CrysAlisPro Data Collection and Processing Software for Agilent X-Ray Diffractometers. *Technol. UK Ltd, Yarnton, Oxford, UK* **2014**, *44* (0), 1–53.
- (6) Sheldrick, G. M., *Acta Crystallogr. Sect. A Found. Crystallogr.* **2008**, *64* (1), 112–122.
- (7) Sheldrick, G. M., *Acta Crystallogr. Sect. C Struct. Chem.* **2015**, *71* (1), 3–8.
- (8) Dolomanov, O. V.; Bourhis, L. J.; Gildea, R. J.; Howard, J. A. K.; Puschmann, H., *J. Appl. Crystallogr.* **2009**, *42* (2), 339–341.
- (9) Farrugia, L. J., *J. Appl. Crystallogr.* **2012**, *45* (4), 849–854.
- (10) Persistence of Vision Raytracer (Version 3.6). POV-Ray. Persistence of Vision Pty. Ltd. (2004): Williamstown, Victoria, Australia. 2004.
- (11) Giannozzi P, Baseggio O., Bonfà P., Brunato D., Car R., Carnimeo I., Cavazzoni C., de Gironcoli S., Delugas P., Ruffino F.F., Ferretti A., Marzari N., Timrov I., Urru A. and Baroni S., *J. Chem. Phys.*, 2020, **152**, 154105
- (12) Garrity K. F., Bennett J. W., Rabe K. M. and Vanderbilt D., *Comput. Mater. Sci.*, 2014, **81**, 446.
- (13) (a) Perdew J. P., Burke K. and Ernzerhof M., *Phys. Rev. Lett.*, 1996, **77**, 3865. (b) Perdew J. P., Burke K. and Ernzerhof M., *Phys. Rev. Lett.* 1997, **78**, 1396–1396.
- (14) Togo A.; Oba F. and Tanaka I., *Phys. Rev. B*, 2008, **78**, 134106.
- (15) Skelton J. M., Parker S. C., Togo A., Tanaka I. and Walsh A., *Phys. Rev. B*, 2014, **89**, 205203.
- (16) Frisch M. J., et al. Gaussian 09, Revision D.01, Gaussian, Inc., Wallingford CT, 2016.
- (17) Dunning T. H., *J. Chem. Phys.* 1989, **90**, 1007–1024.
- (18) Martin J. M. L. and Sundermann A., *J. Chem. Phys.* 2001, **114**, 3408–3420.
- (19) (a) Grimme S., *J. Comput. Chem.* 2004, **25** (12), 1463–1473. (b) Grimme S., *J. Comput. Chem.* 2006, **27** (15), 1787–1799. (c) Grimme S., *Wiley Interdiscip. Rev. Comput. Mol. Sci.* 2011, **1** (2), 211–228.
- (20) Aquilante, F. et al, *J. Comput. Chem.* 2016, *37*, 506-541.
- (21) (a) Roos, B. O.; Lindh, R.; Malmqvist, P.-Å.; Veryazov, V.; Widmark, P.-O. *J. Phys. Chem. A* 2005, **109**, 6575–6579. (b) Roos, B. O.; Lindh, R.; Malmqvist, P.-Å.; Veryazov, V.; Widmark, P.-O. *J. Phys. Chem. A* 2004, **108**, 2851–2858.
- (22) Ungur L., Chibotaru L. F. *Chem. Eur. J.* 2017, **23**, 3708–3718.
- (23) Bewley R., Eccleston R., McEwen K., Hayden S., Dove M., Bennington S., Treadgold J. and Coleman R., *Physica B*, 2006, **385-386**, 1029–1031.
- (24) Arnold O., Bilheux J.C., Borreguero J.M., Buts A., Campbell S.I., Chapon L., Doucet M., Draper N., Ferraz Leal R., Gigg M.A., Lynch V.E., Markvardsen A., Mikkelsen D.J., Mikkelsen R.L., Miller R., Palmén K., Parker P., Passos G., Perring T.G., Peterson P.F., Ren S., Reuter M.A., Savici A.T., Taylor J.W., Tolchenov R., Zhou W., Zikovsky J., *Nuclear Instruments and Methods in Physics Research A*, 2014, **764**, 156166.
- (25) C. A. P. Goodwin, F. Ortu, D. Reta, N. F. Chilton & D. P. Mills, *Nature* **548**, 439 (2017).
